# Supplementary material for: Spontaneous and iatrogenic ovarian hyperstimulation syndrome in the absence of FSHR mutations: a case report of two unexpected cases
Source: PubMed Central journal article supplement (PMC9990314; doi:10.1186/s12920-023-01473-3), 2023-03-07
Supplement: 12920_2023_1473_MOESM1_ESM.pdf [file 12920_2023_1473_MOESM1_ESM.pdf]

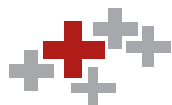

# CARE Checklist (2013) of information to include when writing a case report

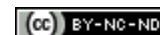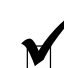

| Topic                           | Item | Checklist item description                                                                                    | Reported on Page                  |
|---------------------------------|------|---------------------------------------------------------------------------------------------------------------|-----------------------------------|
| <b>Title</b>                    | 1    | The words “case report” should be in the title along with the area of focus . . . . .                         | 1                                 |
| <b>Key Words</b>                | 2    | 2 to 5 key words that identify areas covered in this case report. . . . .                                     | 2                                 |
| <b>Abstract</b>                 | 3a   | Introduction—What is unique about this case? What does it add to the medical literature? . . . . .            | 28-42                             |
|                                 | 3b   | The main symptoms of the patient and the important clinical findings . . . . .                                | 28-42                             |
|                                 | 3c   | The main diagnoses, therapeutics interventions, and outcomes . . . . .                                        | 28-42                             |
|                                 | 3d   | Conclusion—What are the main “take-away” lessons from this case? . . . . .                                    | 43-48                             |
| <b>Introduction</b>             | 4    | One or two paragraphs summarizing why this case is unique with references . . . . .                           | 54-107                            |
| <b>Patient Information</b>      | 5a   | De-identified demographic information and other patient specific information . . . . .                        | 109-197                           |
|                                 | 5b   | Main concerns and symptoms of the patient . . . . .                                                           | 109-197                           |
|                                 | 5c   | Medical, family, and psychosocial history including relevant genetic information (also see timeline). . . . . | 109-197                           |
|                                 | 5d   | Relevant past interventions and their outcomes . . . . .                                                      | 109-197                           |
| <b>Clinical Findings</b>        | 6    | Describe the relevant physical examination (PE) and other significant clinical findings. . . . .              | 109-197                           |
| <b>Timeline</b>                 | 7    | Important information from the patient’s history organized as a timeline . . . . .                            | 109-197                           |
| <b>Diagnostic Assessment</b>    | 8a   | Diagnostic methods (such as PE, laboratory testing, imaging, surveys). . . . .                                | 199-224                           |
|                                 | 8b   | Diagnostic challenges (such as access, financial, or cultural) . . . . .                                      | Na                                |
|                                 | 8c   | Diagnostic reasoning including other diagnoses considered . . . . .                                           | 109-197                           |
|                                 | 8d   | Prognostic characteristics (such as staging in oncology) where applicable . . . . .                           | Na                                |
| <b>Therapeutic Intervention</b> | 9a   | Types of intervention (such as pharmacologic, surgical, preventive, self-care) . . . . .                      | 109-197                           |
|                                 | 9b   | Administration of intervention (such as dosage, strength, duration) . . . . .                                 | 109-197                           |
|                                 | 9c   | Changes in intervention (with rationale) . . . . .                                                            | 109-197                           |
| <b>Follow-up and Outcomes</b>   | 10a  | Clinician and patient-assessed outcomes (when appropriate) . . . . .                                          | 109-197                           |
|                                 | 10b  | Important follow-up diagnostic and other test results . . . . .                                               | 109-197                           |
|                                 | 10c  | Intervention adherence and tolerability (How was this assessed?) . . . . .                                    | Na                                |
|                                 | 10d  | Adverse and unanticipated events . . . . .                                                                    | Na                                |
| <b>Discussion</b>               | 11a  | Discussion of the strengths and limitations in your approach to this case . . . . .                           | 289-298                           |
|                                 | 11b  | Discussion of the relevant medical literature. . . . .                                                        | 266-288                           |
|                                 | 11c  | The rationale for conclusions (including assessment of possible causes) . . . . .                             | 301-305                           |
|                                 | 11d  | The primary “take-away” lessons of this case report. . . . .                                                  | 301-305                           |
| <b>Patient Perspective</b>      | 12   | When appropriate the patient should share their perspective on the treatments they received . . . . .         | Na                                |
| <b>Informed Consent</b>         | 13   | Did the patient give informed consent? Please provide if requested . . . . .                                  | Yes X No <input type="checkbox"/> |
